# Supplementary material
Source: PubMed Central journal article supplement (PMC5033399)
Supplement: ja6b00070_si_001.pdf [file ja6b00070_si_001.pdf]

## Supplementary Information

### Sizing and Discovery of Nanosized Polyoxometalate Clusters by Mass Spectrometry

Andrew J. Surman and Philip J. Robbins, Jakub Ujma, Qi Zheng, Perdita E. Barran and Leroy Cronin\*

Email: [Lee.Cronin@glasgow.ac.uk](mailto:Lee.Cronin@glasgow.ac.uk)

WestCHEM, School of Chemistry, University of Glasgow, Glasgow, G12 8QQ, UK

\*To whom correspondence should be addressed.

#### Table of Contents

1. Calibrant set
2. Linear Field Drift Tube Ion Mobility Mass Spectrometry
3. Ion-Mobility Mass Spectrometry of calibrant set
4. Ion Mobility-Mass Spectrometry of 3 giant Tungstate POMs (incl. charge assignments)
5. Ion-Mobility Mass Spectrometry of two literature standards – T10 and Cytochrome C
6. Synthesis and Ion-Mobility Mass Spectrometry of Unknown POWs (incl. charge assignments)
7. Calibration curves
8. Comparison of CCS values – known vs. unknown POWs
9. References

## 1. Calibrant set

Compound **1** (Keggin cluster,  $(C_{16}H_{36}N)_3 \cdot [PW_{12}O_{40}]$ ) and Compound **2** (Dawson cluster –  $(C_{16}H_{36}N)_6 \cdot [P_2W_{18}O_{62}]$ ) were synthesised as tetrabutylammonium (TBA) salts according to standard literature procedures (see manuscript refs 30 and 31), whilst compounds **3** and **4** – the TBA salts of Mn-Anderson clusters ' $(C_{16}H_{36}N)_3 \cdot [MnMo_6O_{24}(C_4H_8N)_2]$ ' and ' $(C_{16}H_{36}N)_3 \cdot [MnMo_6O_{24}(C_{20}H_{38}NO)_2]$ ' respectively – were supplied by our co-workers Drs Mali Rosnes and Carine Yvon respectively.<sup>1,2</sup> All 4 compounds were associated with tetra(*n*-butyl)ammonium (TBA) cations permitting dissolution directly into analytical grade acetonitrile to a working concentration of 0.1mg/ml. Analyte solutions were passed through a 0.2µm filter before injection into the spectrometer *via* syringe pump at 5µl/min.

## 2. Linear Field Drift Tube Ion Mobility Mass Spectrometry

Experiments were performed on a home built ion mobility drift tube coupled to a commercial MS platform (QToF, Micromass, Manchester, UK) was described elsewhere.<sup>3</sup> A 0.1 mg/mL acetonitrile solution of sample was sprayed from home-made nano-electrospray tips (Sutter Instruments, Novato, CA) with the application of 1-1.5 kV. Ions were directed into a Z-spray ion source (Micromass, Manchester, UK) and trapped in a hexapole guide for 20 ms (1e-3 Torr, 50-300 Vp-p, 500 kHz) prior to injection (typically 35V offset) into the drift cell containing 3.5 Torr Helium held at 300K. Pressure of the drift gas is monitored with a capacitance manometer (MKS Baratron) and temperature is monitored with two thermocouples. In order to accurately measure the mobility of ions in helium buffer gas, arrival times were measured at several electric fields (3-9 Td) and the linear correlation of arrival time vs P/V obtained, where the slope is proportional to the mobility  $K$  and the intercept provides the time spent in the QToF prior detection (dead time).<sup>4,5</sup> Fundamental ion mobility equation<sup>6</sup> (1) was used to calculate the collision cross sections at effective ion temperature<sup>7</sup>  $T_{eff}$  (2):

$$K \approx \frac{3}{16} \frac{q}{N} \left( \frac{1}{M} + \frac{1}{m} \right)^{1/2} \left( \frac{2\pi}{k_B T_{eff}} \right)^{1/2} \frac{1}{\Omega_D(T_{eff})} \quad (1)$$

$$T_{eff} = T + \frac{M(KE)^2}{3k_B} \quad (2)$$

Where:  $q$  – charge of the ion,  $N$  – gas number density,  $M$  – mass of the gas molecule,  $m$  – mass of the ion,  $k_B$  – Boltzmann Constant,  $T$  – temperature of the buffer gas,  $\Omega_D(T_{eff})$  – collision cross section at the effective ion temperature (CCS).

### 3. Calibrant set and TW Ion-Mobility Mass Spectrometry

TW-IM-MS data reported here corresponds to that shown in Fig 3, and is typical of a number of calibrations using the same calibrant set and different TW-IM-MS settings (wave height, wave velocity) depending on IM properties of the chosen analyte. Standard deviations in drift time ( $t_D$ ) refer to deviation of three repetitions of the same measurement, using the same settings.

Data were acquired using MassLynx v4.1 and initially processed using DriftScope v2.2. IMS-MS spectra are displayed with a linear intensity scale using the color-coding shown in the accompanying key; no filtering is applied to limit signals (e.g., no filtering of signals <5% in 2D map; that is, few other signals are visible in the raw data with no manipulation). To determine drift times ( $t_D$ ) of species of interest in the IMS arrival time distribution (ATD), data were extracted from Driftscope/Masslynx, and fit to Gaussian curves using Fityk v0.9.8 to determine a representative retention times peak center. Typical TW-IM-MS settings were: ESI capillary voltage, 2.7 kV; sample cone voltage, 30 V; extraction cone voltage, 4.0 V; source temperature, 80 °C; desolvation temperature, 180 °C; cone gas (N<sub>2</sub>) flow, 15 L/h; desolvation gas (N<sub>2</sub>) flow, 750 L/h; IMS gas flow, 90 mL/min. The results in this section utilise: IMS wave velocity, 1000 m/s; IMS wave height, 40 V.

### 3.1 Compound 1 – PW<sub>12</sub>O<sub>40</sub>

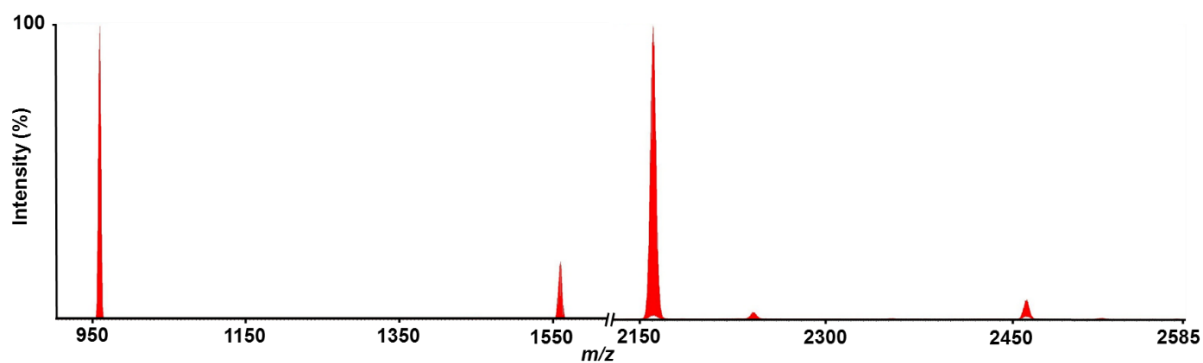

| <i>m/z</i> | <i>assignment</i>                                                   | <i>z</i> | <i>m/z(calc)</i> |
|------------|---------------------------------------------------------------------|----------|------------------|
| 959        | PW <sub>12</sub> O <sub>40</sub>                                    | 3        | 958.73           |
| 1560       | (TBA)PW <sub>12</sub> O <sub>40</sub>                               | 2        | 1559.23          |
| 2161       | (TBA) <sub>3</sub> (PW <sub>12</sub> O <sub>40</sub> ) <sub>2</sub> | 3        | 2160.41          |
| 2461       | (TBA) <sub>5</sub> (PW <sub>12</sub> O <sub>40</sub> ) <sub>3</sub> | 4        | 2460.74          |

**Fig. S1.** HRES-ESI-MS of compound 1 – PW<sub>12</sub>O<sub>40</sub> and assignment table

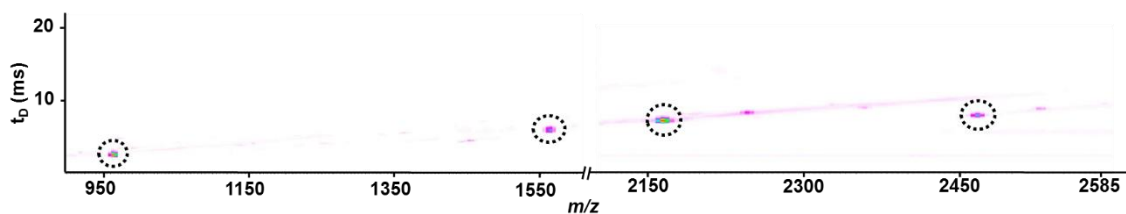

| <i>m/z</i> | <i>assignment</i>                                                   | <i>t<sub>D</sub> (ms)</i> | <i>stndev(t<sub>D</sub>)</i> | <sup>TW</sup> <i>CCS</i> <sub>N<sub>2</sub>→He</sub> | <sup>DT</sup> <i>CCS</i> <sub>He</sub> |
|------------|---------------------------------------------------------------------|---------------------------|------------------------------|------------------------------------------------------|----------------------------------------|
| 959        | PW <sub>12</sub> O <sub>40</sub>                                    | 2.426                     | 0                            | 161.04                                               | 150                                    |
| 1560       | (TBA)PW <sub>12</sub> O <sub>40</sub>                               | 5.843                     | 0                            | 212.60                                               | 207                                    |
| 2161       | (TBA) <sub>3</sub> (PW <sub>12</sub> O <sub>40</sub> ) <sub>2</sub> | 7.497                     | 0                            | 386.17                                               | 368                                    |
| 2461       | (TBA) <sub>5</sub> (PW <sub>12</sub> O <sub>40</sub> ) <sub>3</sub> | 8.269                     | 0.063509                     | 551.72                                               | 524                                    |

**Fig. S2.** TW-IM-MS of compound 1 – PW<sub>12</sub>O<sub>40</sub> and assignment table

### 3.2 Compound 2 – P<sub>2</sub>W<sub>18</sub>O<sub>62</sub>

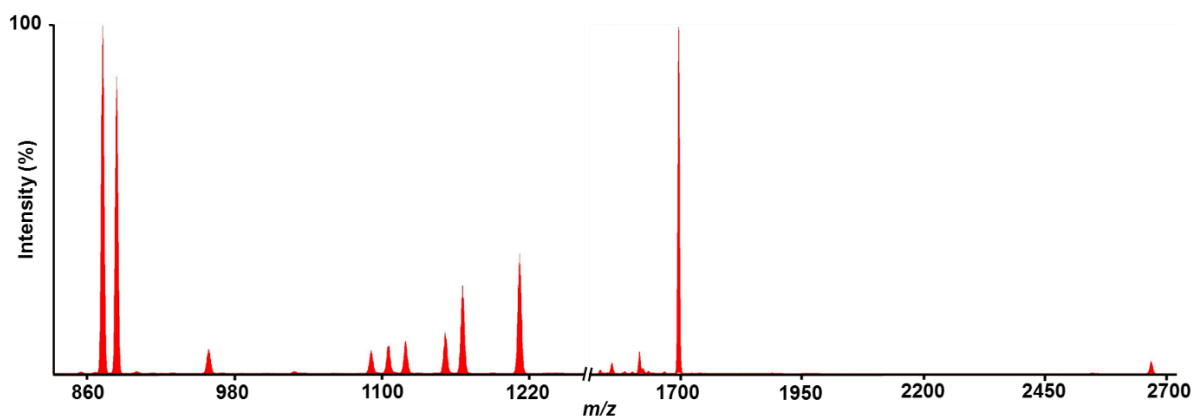

| <i>m/z</i> | <i>assignment</i>                                                                   | <i>z</i> | <i>m/z(calc)</i> |
|------------|-------------------------------------------------------------------------------------|----------|------------------|
| 872        | H <sub>1</sub> (P <sub>2</sub> W <sub>18</sub> O <sub>62</sub> )                    | 5        | 872.75           |
| 1212       | (TBA) <sub>2</sub> (P <sub>2</sub> W <sub>18</sub> O <sub>62</sub> )                | 4        | 1211.83          |
| 1536       | H <sub>2</sub> (TBA) <sub>1</sub> (P <sub>2</sub> W <sub>18</sub> O <sub>62</sub> ) | 3        | 1535.68          |
| 1616       | H <sub>1</sub> (TBA) <sub>2</sub> (P <sub>2</sub> W <sub>18</sub> O <sub>62</sub> ) | 3        | 1616.11          |
| 1697       | (TBA) <sub>3</sub> (P <sub>2</sub> W <sub>18</sub> O <sub>62</sub> )                | 3        | 1696.87          |
| 2666       | (TBA) <sub>4</sub> (P <sub>2</sub> W <sub>18</sub> O <sub>62</sub> )                | 2        | 2666.45          |

**Fig. S3.** HRES-ESI-MS of compound 2 – P<sub>2</sub>W<sub>18</sub>O<sub>62</sub> and assignment table

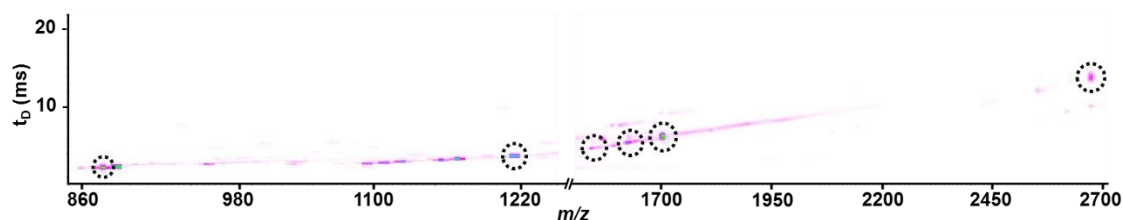

| <i>m/z</i> | <i>assignment</i>                                                                   | <i>t<sub>D</sub> (ms)</i> | <i>stndev(t<sub>D</sub>)</i> | <sup>TW</sup> <i>CCS</i> <sub>N<sub>2</sub>→He</sub> | <sup>DT</sup> <i>CCS</i> <sub>He</sub> |
|------------|-------------------------------------------------------------------------------------|---------------------------|------------------------------|------------------------------------------------------|----------------------------------------|
| 872        | H <sub>1</sub> (P <sub>2</sub> W <sub>18</sub> O <sub>62</sub> )                    | 2.095                     | 0                            | 235.57                                               | 209                                    |
| 1212       | (TBA) <sub>2</sub> (P <sub>2</sub> W <sub>18</sub> O <sub>62</sub> )                | 3.528                     | 0.092376                     | 283.80                                               | 314                                    |
| 1536       | H <sub>2</sub> (TBA) <sub>1</sub> (P <sub>2</sub> W <sub>18</sub> O <sub>62</sub> ) | 4.631                     | 0.063509                     | 263.41                                               | 245                                    |
| 1616       | H <sub>1</sub> (TBA) <sub>2</sub> (P <sub>2</sub> W <sub>18</sub> O <sub>62</sub> ) | 5.402                     | 0                            | 297.19                                               | 310                                    |
| 1697       | (TBA) <sub>3</sub> (P <sub>2</sub> W <sub>18</sub> O <sub>62</sub> )                | 6.064                     | 0                            | 325.31                                               | 357                                    |
| 2666       | (TBA) <sub>4</sub> (P <sub>2</sub> W <sub>18</sub> O <sub>62</sub> )                | 13.892                    | 2.18E-15                     | 414.38                                               | 412                                    |

**Fig. S4.** TW-IM-MS of compound 2 – P<sub>2</sub>W<sub>18</sub>O<sub>62</sub> and assignment table

### 3.3 Compound **3** – tris-substituted MnMo<sub>6</sub>O<sub>24</sub>

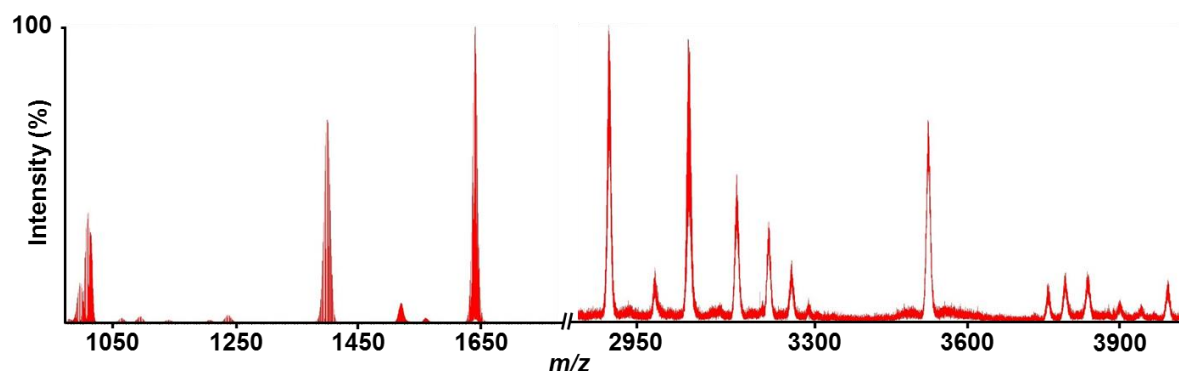

| <i>m/z</i> | <i>assignment</i>                                                                                                                  | <i>z</i> | <i>m/z(calc)</i> |
|------------|------------------------------------------------------------------------------------------------------------------------------------|----------|------------------|
| 1012       | (TBA) <sub>3</sub> (MnMo <sub>6</sub> O <sub>24</sub> (C <sub>4</sub> H <sub>8</sub> N) <sub>2</sub> ) <sub>2</sub>                | 3        | 1012.21          |
| 1398       | H <sub>1</sub> (TBA) <sub>1</sub> (MnMo <sub>6</sub> O <sub>24</sub> (C <sub>4</sub> H <sub>8</sub> N) <sub>2</sub> )              | 1        | 1397.67          |
| 1519       | H <sub>1</sub> (TBA) <sub>3</sub> (MnMo <sub>6</sub> O <sub>24</sub> (C <sub>4</sub> H <sub>8</sub> N) <sub>2</sub> ) <sub>2</sub> | 2        | 1518.81          |
| 1640       | (TBA) <sub>4</sub> (MnMo <sub>6</sub> O <sub>24</sub> (C <sub>4</sub> H <sub>8</sub> N) <sub>2</sub> ) <sub>2</sub>                | 2        | 1639.95          |
| 2894       | (TBA) <sub>12</sub> (MnMo <sub>6</sub> O <sub>24</sub> (C <sub>4</sub> H <sub>8</sub> N) <sub>2</sub> ) <sub>5</sub>               | 3        | 2894.45          |
| 3145       | (TBA) <sub>22</sub> (MnMo <sub>6</sub> O <sub>24</sub> (C <sub>4</sub> H <sub>8</sub> N) <sub>2</sub> ) <sub>9</sub>               | 5        | 3145.34          |
| 3208       | (TBA) <sub>27</sub> (MnMo <sub>6</sub> O <sub>24</sub> (C <sub>4</sub> H <sub>8</sub> N) <sub>2</sub> ) <sub>11</sub>              | 6        | 3208.15          |
| 3522       | (TBA) <sub>5</sub> (MnMo <sub>6</sub> O <sub>24</sub> (C <sub>4</sub> H <sub>8</sub> N) <sub>2</sub> ) <sub>2</sub>                | 1        | 3522.19          |
| 3992       | (TBA) <sub>23</sub> (MnMo <sub>6</sub> O <sub>24</sub> (C <sub>4</sub> H <sub>8</sub> N) <sub>2</sub> ) <sub>9</sub>               | 4        | 3992.50          |

**Fig. S5.** HRES-ESI-MS of compound **3** – tris-substituted MnMo<sub>6</sub>O<sub>24</sub> and assignment table

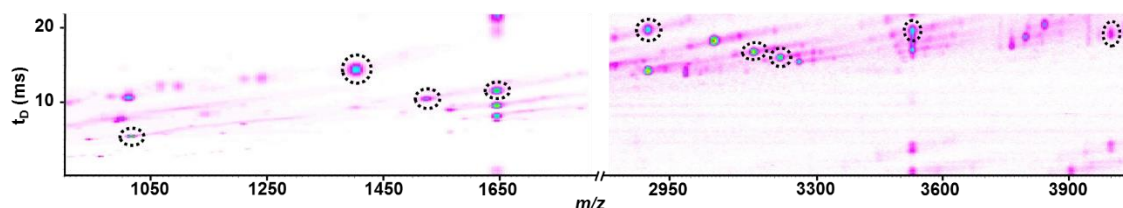

| <i>m/z</i> | <i>assignment</i>                                                                                                                  | <i>t<sub>D</sub></i> (ms) | <i>stndev(t<sub>D</sub>)</i> | <sup>TW</sup> <i>CCS</i> <sub>N<sub>2</sub>→He</sub> | <sup>DT</sup> <i>CCS</i> <sub>He</sub> |
|------------|------------------------------------------------------------------------------------------------------------------------------------|---------------------------|------------------------------|------------------------------------------------------|----------------------------------------|
| 1012       | (TBA) <sub>3</sub> (MnMo <sub>6</sub> O <sub>24</sub> (C <sub>4</sub> H <sub>8</sub> N) <sub>2</sub> ) <sub>2</sub>                | 5.292                     | 0                            | 293.44                                               | 326                                    |
| 1398       | H <sub>1</sub> (TBA) <sub>1</sub> (MnMo <sub>6</sub> O <sub>24</sub> (C <sub>4</sub> H <sub>8</sub> N) <sub>2</sub> )              | 14.333                    | 0.063509                     | 214.10                                               | 213                                    |
| 1519       | H <sub>1</sub> (TBA) <sub>3</sub> (MnMo <sub>6</sub> O <sub>24</sub> (C <sub>4</sub> H <sub>8</sub> N) <sub>2</sub> ) <sub>2</sub> | 10.474                    | 0                            | 333.38                                               | 353                                    |
| 1640       | (TBA) <sub>4</sub> (MnMo <sub>6</sub> O <sub>24</sub> (C <sub>4</sub> H <sub>8</sub> N) <sub>2</sub> ) <sub>2</sub>                | 11.577                    | 0                            | 360.32                                               | 333                                    |
| 2894       | (TBA) <sub>12</sub> (MnMo <sub>6</sub> O <sub>24</sub> (C <sub>4</sub> H <sub>8</sub> N) <sub>2</sub> ) <sub>5</sub>               | 19.732                    | 0.271932                     | 816.52                                               | 740                                    |
| 3145       | (TBA) <sub>22</sub> (MnMo <sub>6</sub> O <sub>24</sub> (C <sub>4</sub> H <sub>8</sub> N) <sub>2</sub> ) <sub>9</sub>               | 16.759                    | 0                            | 1196.98                                              | 1181                                   |
| 3208       | (TBA) <sub>27</sub> (MnMo <sub>6</sub> O <sub>24</sub> (C <sub>4</sub> H <sub>8</sub> N) <sub>2</sub> ) <sub>11</sub>              | 15.987                    | 0                            | 1384.16                                              | 1371                                   |
| 3522       | (TBA) <sub>5</sub> (MnMo <sub>6</sub> O <sub>24</sub> (C <sub>4</sub> H <sub>8</sub> N) <sub>2</sub> ) <sub>2</sub>                | 19.699                    | 0                            | 272.37                                               | 274                                    |
| 3992       | (TBA) <sub>23</sub> (MnMo <sub>6</sub> O <sub>24</sub> (C <sub>4</sub> H <sub>8</sub> N) <sub>2</sub> ) <sub>9</sub>               | 19.141                    | 0.11                         | 1061.81                                              | 1125                                   |

**Fig. S6.** TW-IM-MS of compound **3** – tris-substituted  $\text{MnMo}_6\text{O}_{24}$  and assignment table

3.4 Compound **4** – aliphatic-substituted Mn

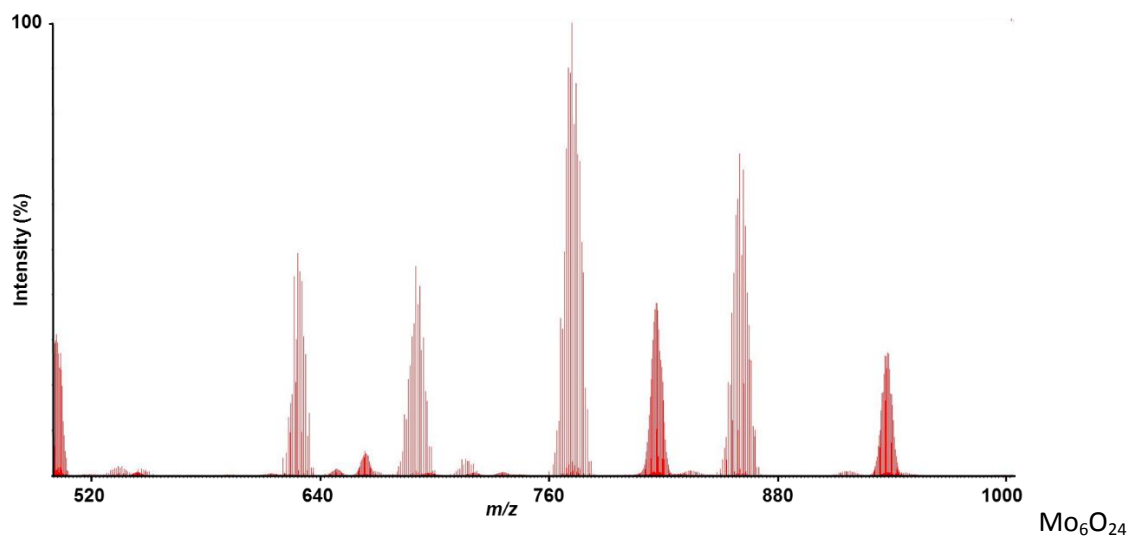

| <i>m/z</i> | <i>assignment</i>                                                                                             | <i>z</i> | <i>m/z(calc)</i> |
|------------|---------------------------------------------------------------------------------------------------------------|----------|------------------|
| 544        | $(\text{MnMo}_6\text{O}_{24}(\text{C}_{20}\text{H}_{38}\text{NO})_2)$                                         | 3        | 543.95           |
| 817        | $(\text{TBA})(\text{MnMo}_6\text{O}_{24}(\text{C}_{20}\text{H}_{38}\text{NO})(\text{C}_4\text{H}_8\text{N}))$ | 2        | 817.95           |
| 937        | $(\text{TBA})(\text{MnMo}_6\text{O}_{24}(\text{C}_{20}\text{H}_{38}\text{NO})_2)$                             | 2        | 937.06           |

**Fig. S7.** HRES-ESI-MS of compound **4** – aliphatic-substituted  $\text{MnMo}_6\text{O}_{24}$  and assignment table

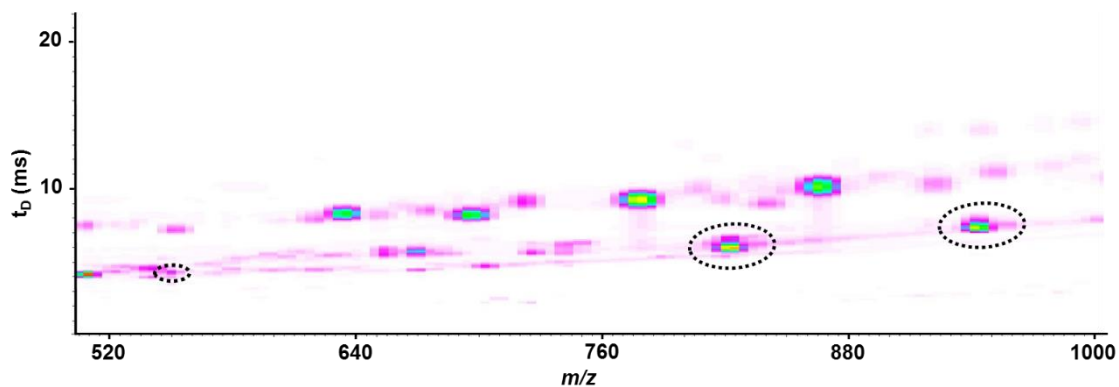

| <i>m/z</i> | <i>assignment</i>                                                                                             | <i>t<sub>D</sub> (ms)</i> | <i>stndev(t<sub>D</sub>)</i> | <i><sup>TW</sup>CCS<sub>N<sub>2</sub>→He</sub></i> | <i><sup>DT</sup>CCS<sub>He</sub></i> |
|------------|---------------------------------------------------------------------------------------------------------------|---------------------------|------------------------------|----------------------------------------------------|--------------------------------------|
| 544        | $(\text{MnMo}_6\text{O}_{24}(\text{C}_{20}\text{H}_{38}\text{NO})_2)$                                         | 4.19                      | 0                            | 245.82                                             | 253                                  |
| 817        | $(\text{TBA})(\text{MnMo}_6\text{O}_{24}(\text{C}_{20}\text{H}_{38}\text{NO})(\text{C}_4\text{H}_8\text{N}))$ | 5.843                     | 0.063509                     | 212.37                                             | 242                                  |
| 937        | $(\text{TBA})(\text{MnMo}_6\text{O}_{24}(\text{C}_{20}\text{H}_{38}\text{NO})_2)$                             | 7.277                     | 0                            | 251.78                                             | 247                                  |

**Fig. S8.** TW-IM-MS of compound **4** – aliphatic-substituted  $\text{MnMo}_6\text{O}_{24}$  and assignment table





#### 4. Ion Mobility-Mass Spectrometry of 3 giant Tungstate POMs (incl. charge assignments)

Compounds A-C were synthesised as reported in ref 8 and the anion compositions are as follows:

**A** - POW 'trimer'  $\{\text{Se}_8\text{W}_{86}\text{O}_{299}\}$ , full formula is  $[\text{H}_4\text{CoWO}(\text{H}_2\text{O})_3(\text{Se}_2\text{W}_{26}\text{O}_{85})(\text{Se}_3\text{W}_{30}\text{O}_{107})_2]^{40-}$

**B** – POW 'tetramer'  $\{\text{Se}_8\text{W}_{116}\text{O}_{408}\}$ , full formula is  $[\text{H}_{26}\text{Mn}_2\text{W}_2\text{O}_4(\text{H}_2\text{O})_4(\text{Se}_2\text{W}_{29}\text{O}_{102})_4]^{44-}$

**C** –  $\{\text{Se}_{12}\text{W}_{174}\text{O}_{612}\}$ , full formula is  $[\text{H}_{18}\text{Cu}_9\text{Cl}_3(\text{H}_2\text{O})_{18}(\text{Se}_2\text{W}_{29}\text{O}_{102})_6]^{99-}$

##### 4.1 Mass Spectrum of compound A - POW 'trimer' $\{\text{Se}_8\text{W}_{86}\text{O}_{299}\}$

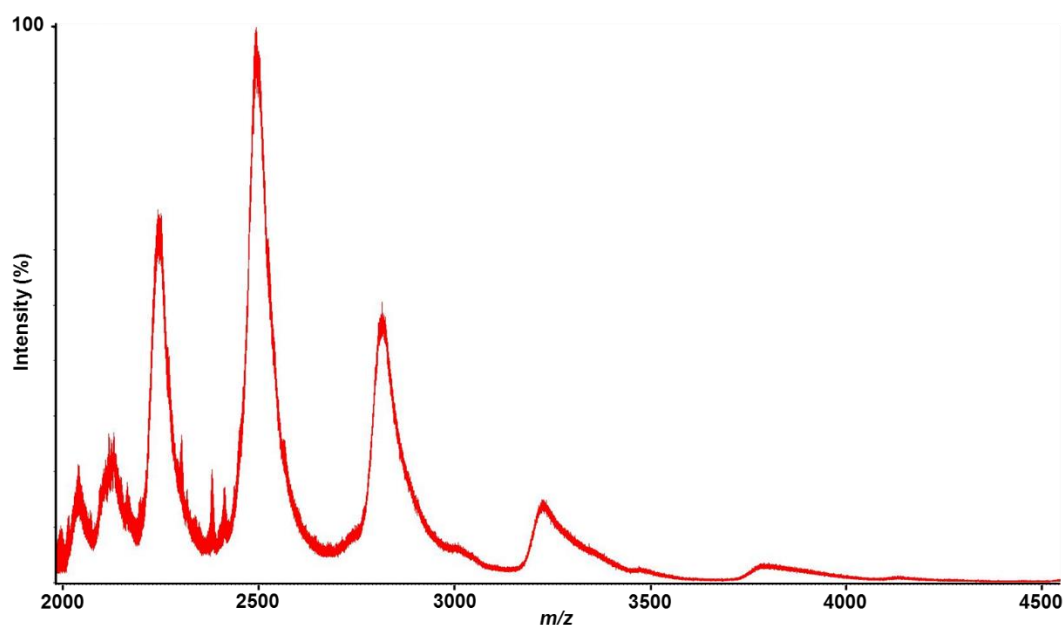

| <i>m/z</i> | <i>Assignment</i>                                                                                                                                                                       | <i>z</i> | <i>m/z(calc)</i> |
|------------|-----------------------------------------------------------------------------------------------------------------------------------------------------------------------------------------|----------|------------------|
| 2039       | $[\text{H}_4\text{CoWO}(\text{H}_2\text{O})_3(\text{Se}_2\text{W}_{26}\text{O}_{85})(\text{Se}_3\text{W}_{30}\text{O}_{107})_2]\text{K}_{17}(\text{C}_2\text{H}_8\text{N})_5\text{H}_7$ | 11       | 2040.39          |
| 2243       | $[\text{H}_4\text{CoWO}(\text{H}_2\text{O})_3(\text{Se}_2\text{W}_{26}\text{O}_{85})(\text{Se}_3\text{W}_{30}\text{O}_{107})_2]\text{K}_{17}(\text{C}_2\text{H}_8\text{N})_5\text{H}_8$ | 10       | 2244.53          |
| 2494       | $[\text{H}_4\text{CoWO}(\text{H}_2\text{O})_3(\text{Se}_2\text{W}_{26}\text{O}_{85})(\text{Se}_3\text{W}_{30}\text{O}_{107})_2]\text{K}_{17}(\text{C}_2\text{H}_8\text{N})_5\text{H}_9$ | 9        | 2494.04          |
| 2814       | $[\text{H}_4\text{CoWO}(\text{H}_2\text{O})_3(\text{Se}_2\text{W}_{26}\text{O}_{85})(\text{Se}_3\text{W}_{30}\text{O}_{107})_2]\text{K}_{19}(\text{C}_2\text{H}_8\text{N})_5\text{H}_8$ | 8        | 2815.53          |
| 3227       | $[\text{H}_4\text{CoWO}(\text{H}_2\text{O})_3(\text{Se}_2\text{W}_{26}\text{O}_{85})(\text{Se}_3\text{W}_{30}\text{O}_{107})_2]\text{K}_{22}(\text{C}_2\text{H}_8\text{N})_4\text{H}_7$ | 7        | 3227.73          |
| 3789       | $[\text{H}_4\text{CoWO}(\text{H}_2\text{O})_3(\text{Se}_2\text{W}_{26}\text{O}_{85})(\text{Se}_3\text{W}_{30}\text{O}_{107})_2]\text{K}_{21}(\text{C}_2\text{H}_8\text{N})_8\text{H}_5$ | 6        | 3789.56          |

**Fig. S9.** HRES-ESI-MS of compound A -  $\{\text{Se}_8\text{W}_{86}\text{O}_{299}\}$  and assignment table

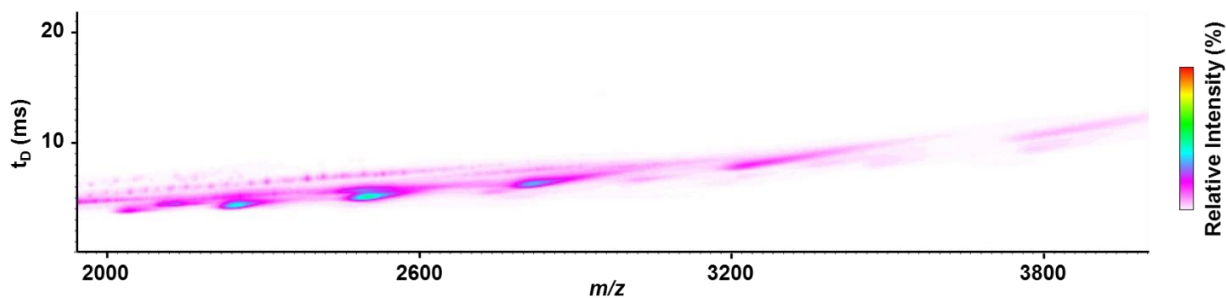

| $m/z$ | assignment                                                                     | $t_D$ (ms) | $^{TW}CCS_{N_2 \rightarrow He}$ |
|-------|--------------------------------------------------------------------------------|------------|---------------------------------|
| 2039  | $[H_4CoWO(H_2O)_3(Se_2W_{26}O_{85})(Se_3W_{30}O_{107})_2]K_{17}(C_2H_8N)_5H_7$ | 3.75       | 824.65                          |
| 2243  | $[H_4CoWO(H_2O)_3(Se_2W_{26}O_{85})(Se_3W_{30}O_{107})_2]K_{17}(C_2H_8N)_5H_8$ | 4.19       | 817.3                           |
| 2494  | $[H_4CoWO(H_2O)_3(Se_2W_{26}O_{85})(Se_3W_{30}O_{107})_2]K_{17}(C_2H_8N)_5H_9$ | 4.961      | 838.88                          |
| 2814  | $[H_4CoWO(H_2O)_3(Se_2W_{26}O_{85})(Se_3W_{30}O_{107})_2]K_{19}(C_2H_8N)_5H_8$ | 6.23       | 890.21                          |
| 3227  | $[H_4CoWO(H_2O)_3(Se_2W_{26}O_{85})(Se_3W_{30}O_{107})_2]K_{22}(C_2H_8N)_4H_7$ | 8.049      | 950.64                          |
| 3789  | $[H_4CoWO(H_2O)_3(Se_2W_{26}O_{85})(Se_3W_{30}O_{107})_2]K_{21}(C_2H_8N)_8H_5$ | 10.97      | 1036.61                         |

Fig. S10. TW-IM-MS of compound A -  $\{Se_8W_{86}O_{299}\}$  and assignment table

#### 4.2 Mass Spectrum of compound B— POW 'tetramer' $\{Se_8W_{116}O_{408}\}$

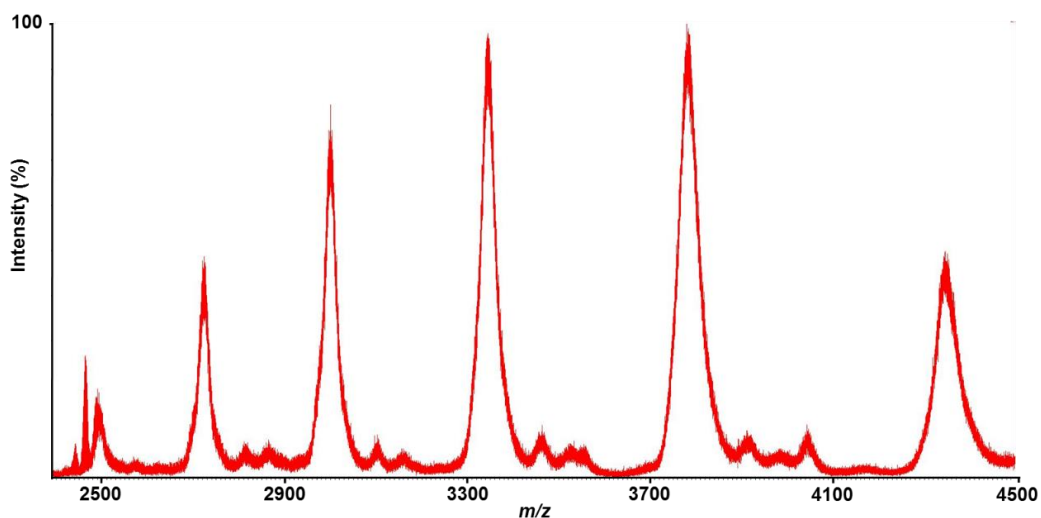

| $m/z$ | assignment                                                                  | $z$ | $m/z$ (calc) |
|-------|-----------------------------------------------------------------------------|-----|--------------|
| 2493  | $[H_{26}Mn_2W_2O_4(H_2O)_4(Se_2W_{29}O_{102})_4]K_{13}(C_2H_8N)_6H_{13}$    | 12  | 2493.55      |
| 2723  | $[H_{26}Mn_2W_2O_4(H_2O)_4(Se_2W_{29}O_{102})_4]K_{14}(C_2H_8N)_6H_{13}$    | 11  | 2723.78      |
| 3000  | $[H_{26}Mn_2W_2O_4(H_2O)_4(Se_2W_{29}O_{102})_4]K_{15}(C_2H_8N)_6H_{13}$    | 10  | 3000.06      |
| 3346  | $[H_{26}Mn_2W_2O_4(H_2O)_4(Se_2W_{29}O_{102})_4]K_{11}(C_2H_8N)_{12}H_{12}$ | 9   | 3346.68      |
| 3781  | $[H_{26}Mn_2W_2O_4(H_2O)_4(Se_2W_{29}O_{102})_4]K_{12}(C_2H_8N)_{14}H_{10}$ | 8   | 3781.15      |
| 4346  | $[H_{26}Mn_2W_2O_4(H_2O)_4(Se_2W_{29}O_{102})_4]K_{13}(C_2H_8N)_{17}H_7$    | 7   | 4346.19      |

**Fig. S11.** HRES-ESI-MS of compound **B** – {Se<sub>8</sub>W<sub>116</sub>O<sub>408</sub>} and assignment table

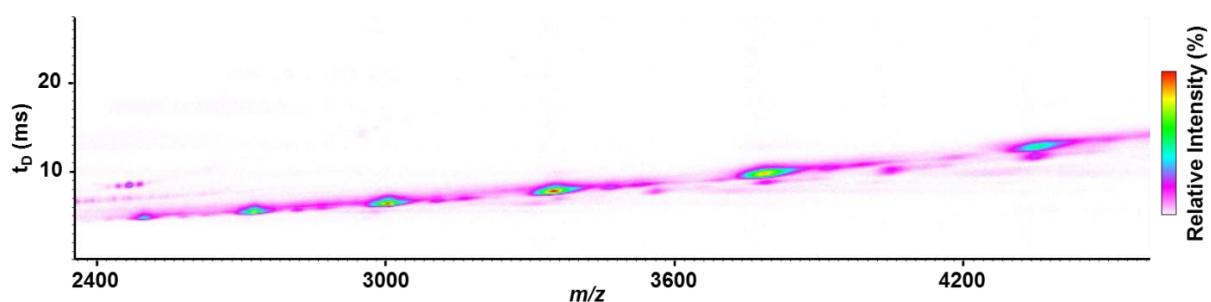

| <i>m/z</i> | <i>assignment</i>                                                                                                                                                                                                                                | <i>t<sub>D</sub></i> (ms) | <sup>TW</sup> CCS <sub>N<sub>2</sub>→He</sub> |
|------------|--------------------------------------------------------------------------------------------------------------------------------------------------------------------------------------------------------------------------------------------------|---------------------------|-----------------------------------------------|
| 2493       | [H <sub>26</sub> Mn <sub>2</sub> W <sub>2</sub> O <sub>4</sub> (H <sub>2</sub> O) <sub>4</sub> (Se <sub>2</sub> W <sub>29</sub> O <sub>102</sub> ) <sub>4</sub> ]K <sub>13</sub> (C <sub>2</sub> H <sub>8</sub> N) <sub>6</sub> H <sub>13</sub>  | 4.701                     | 1072.36                                       |
| 2723       | [H <sub>26</sub> Mn <sub>2</sub> W <sub>2</sub> O <sub>4</sub> (H <sub>2</sub> O) <sub>4</sub> (Se <sub>2</sub> W <sub>29</sub> O <sub>102</sub> ) <sub>4</sub> ]K <sub>14</sub> (C <sub>2</sub> H <sub>8</sub> N) <sub>6</sub> H <sub>13</sub>  | 5.392                     | 1093.69                                       |
| 3000       | [H <sub>26</sub> Mn <sub>2</sub> W <sub>2</sub> O <sub>4</sub> (H <sub>2</sub> O) <sub>4</sub> (Se <sub>2</sub> W <sub>29</sub> O <sub>102</sub> ) <sub>4</sub> ]K <sub>15</sub> (C <sub>2</sub> H <sub>8</sub> N) <sub>6</sub> H <sub>13</sub>  | 6.36                      | 1130.54                                       |
| 3346       | [H <sub>26</sub> Mn <sub>2</sub> W <sub>2</sub> O <sub>4</sub> (H <sub>2</sub> O) <sub>4</sub> (Se <sub>2</sub> W <sub>29</sub> O <sub>102</sub> ) <sub>4</sub> ]K <sub>11</sub> (C <sub>2</sub> H <sub>8</sub> N) <sub>12</sub> H <sub>12</sub> | 7.604                     | 1169.15                                       |
| 3781       | [H <sub>26</sub> Mn <sub>2</sub> W <sub>2</sub> O <sub>4</sub> (H <sub>2</sub> O) <sub>4</sub> (Se <sub>2</sub> W <sub>29</sub> O <sub>102</sub> ) <sub>4</sub> ]K <sub>12</sub> (C <sub>2</sub> H <sub>8</sub> N) <sub>14</sub> H <sub>10</sub> | 9.678                     | 1253.61                                       |
| 4346       | [H <sub>26</sub> Mn <sub>2</sub> W <sub>2</sub> O <sub>4</sub> (H <sub>2</sub> O) <sub>4</sub> (Se <sub>2</sub> W <sub>29</sub> O <sub>102</sub> ) <sub>4</sub> ]K <sub>13</sub> (C <sub>2</sub> H <sub>8</sub> N) <sub>17</sub> H <sub>7</sub>  | 12.79                     | 1362.41                                       |

**Fig. S12.** TW-IM-MS of compound **B** – {Se<sub>8</sub>W<sub>116</sub>O<sub>408</sub>} and assignment table

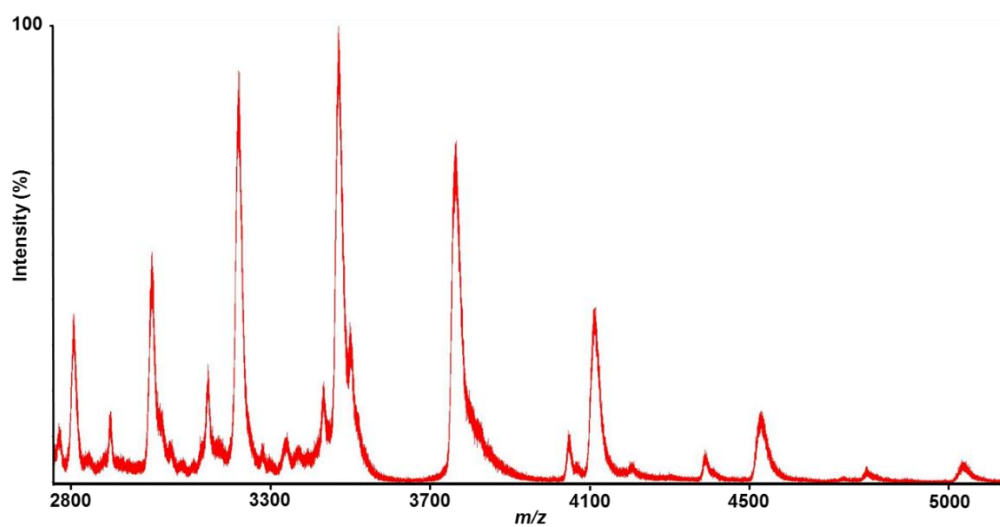

| <i>m/z</i> | <i>assignment</i>                                                                                                                                                       | <i>z</i> | <i>m/z(calc)</i> |
|------------|-------------------------------------------------------------------------------------------------------------------------------------------------------------------------|----------|------------------|
| 2804       | $[\text{H}_{18}\text{Cu}_9\text{Cl}_3(\text{H}_2\text{O})_{18}(\text{Se}_2\text{W}_{29}\text{O}_{102})_6]\text{K}_{17}(\text{C}_2\text{H}_8\text{N})_{20}\text{H}_{46}$ | 16       | 2804.32          |
| 3001       | $[\text{H}_{18}\text{Cu}_9\text{Cl}_3(\text{H}_2\text{O})_{18}(\text{Se}_2\text{W}_{29}\text{O}_{102})_6]\text{K}_{15}(\text{C}_2\text{H}_8\text{N})_{25}\text{H}_{44}$ | 15       | 3001.3           |
| 3217       | $[\text{H}_{18}\text{Cu}_9\text{Cl}_3(\text{H}_2\text{O})_{18}(\text{Se}_2\text{W}_{29}\text{O}_{102})_6]\text{K}_{18}(\text{C}_2\text{H}_8\text{N})_{23}\text{H}_{44}$ | 14       | 3217.44          |
| 3469       | $[\text{H}_{18}\text{Cu}_9\text{Cl}_3(\text{H}_2\text{O})_{18}(\text{Se}_2\text{W}_{29}\text{O}_{102})_6]\text{K}_{17}(\text{C}_2\text{H}_8\text{N})_{25}\text{H}_{44}$ | 13       | 3469.03          |
| 3794       | $[\text{H}_{18}\text{Cu}_9\text{Cl}_3(\text{H}_2\text{O})_{18}(\text{Se}_2\text{W}_{29}\text{O}_{102})_6]\text{K}_{20}(\text{C}_2\text{H}_8\text{N})_{32}\text{H}_{35}$ | 12       | 3794.05          |
| 4114       | $[\text{H}_{18}\text{Cu}_9\text{Cl}_3(\text{H}_2\text{O})_{18}(\text{Se}_2\text{W}_{29}\text{O}_{102})_6]\text{K}_{20}(\text{C}_2\text{H}_8\text{N})_{26}\text{H}_{42}$ | 11       | 4114.48          |
| 4529       | $[\text{H}_{18}\text{Cu}_9\text{Cl}_3(\text{H}_2\text{O})_{18}(\text{Se}_2\text{W}_{29}\text{O}_{102})_6]\text{K}_{22}(\text{C}_2\text{H}_8\text{N})_{25}\text{H}_{42}$ | 10       | 4529.12          |
| 5032       | $[\text{H}_{18}\text{Cu}_9\text{Cl}_3(\text{H}_2\text{O})_{18}(\text{Se}_2\text{W}_{29}\text{O}_{102})_6]\text{K}_{22}(\text{C}_2\text{H}_8\text{N})_{25}\text{H}_{43}$ | 9        | 5032.46          |

**Fig. S13.** HRES-ESI-MS of compound **C** –  $\{\text{Se}_{12}\text{W}_{174}\text{O}_{612}\}$  and assignment table

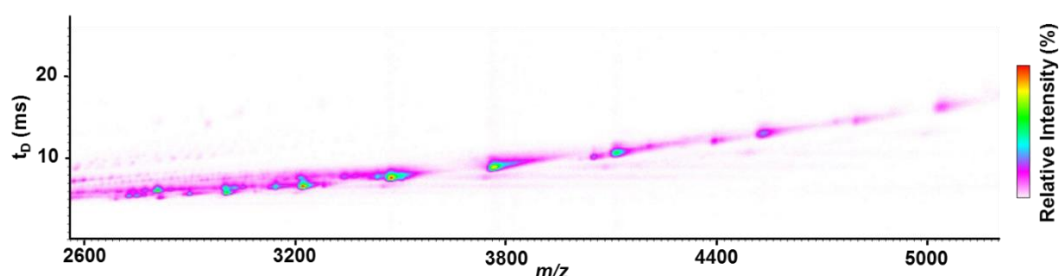

| <i>m/z</i> | <i>assignment</i>                                                                                                                                                       | <i>t<sub>D</sub></i> (ms) | <sup>TW</sup> CCS <sub>N<sub>2</sub>→He</sub> |
|------------|-------------------------------------------------------------------------------------------------------------------------------------------------------------------------|---------------------------|-----------------------------------------------|
| 2804       | $[\text{H}_{18}\text{Cu}_9\text{Cl}_3(\text{H}_2\text{O})_{18}(\text{Se}_2\text{W}_{29}\text{O}_{102})_6]\text{K}_{17}(\text{C}_2\text{H}_8\text{N})_{20}\text{H}_{46}$ | 5.945                     | 1715.85                                       |
| 3001       | $[\text{H}_{18}\text{Cu}_9\text{Cl}_3(\text{H}_2\text{O})_{18}(\text{Se}_2\text{W}_{29}\text{O}_{102})_6]\text{K}_{15}(\text{C}_2\text{H}_8\text{N})_{25}\text{H}_{44}$ | 5.668                     | 1550.04                                       |
| 3217       | $[\text{H}_{18}\text{Cu}_9\text{Cl}_3(\text{H}_2\text{O})_{18}(\text{Se}_2\text{W}_{29}\text{O}_{102})_6]\text{K}_{18}(\text{C}_2\text{H}_8\text{N})_{23}\text{H}_{44}$ | 6.498                     | 1608.99                                       |
| 3469       | $[\text{H}_{18}\text{Cu}_9\text{Cl}_3(\text{H}_2\text{O})_{18}(\text{Se}_2\text{W}_{29}\text{O}_{102})_6]\text{K}_{17}(\text{C}_2\text{H}_8\text{N})_{25}\text{H}_{44}$ | 7.604                     | 1688.36                                       |
| 3794       | $[\text{H}_{18}\text{Cu}_9\text{Cl}_3(\text{H}_2\text{O})_{18}(\text{Se}_2\text{W}_{29}\text{O}_{102})_6]\text{K}_{20}(\text{C}_2\text{H}_8\text{N})_{32}\text{H}_{35}$ | 8.848                     | 1753.39                                       |
| 4114       | $[\text{H}_{18}\text{Cu}_9\text{Cl}_3(\text{H}_2\text{O})_{18}(\text{Se}_2\text{W}_{29}\text{O}_{102})_6]\text{K}_{20}(\text{C}_2\text{H}_8\text{N})_{26}\text{H}_{42}$ | 10.646                    | 1855.94                                       |
| 4529       | $[\text{H}_{18}\text{Cu}_9\text{Cl}_3(\text{H}_2\text{O})_{18}(\text{Se}_2\text{W}_{29}\text{O}_{102})_6]\text{K}_{22}(\text{C}_2\text{H}_8\text{N})_{25}\text{H}_{42}$ | 13.134                    | 1986.49                                       |
| 5032       | $[\text{H}_{18}\text{Cu}_9\text{Cl}_3(\text{H}_2\text{O})_{18}(\text{Se}_2\text{W}_{29}\text{O}_{102})_6]\text{K}_{22}(\text{C}_2\text{H}_8\text{N})_{25}\text{H}_{43}$ | 16.314                    | 2116.09                                       |

**Fig. S14.** TW-IM-MS of compound **C** –  $\{\text{Se}_{12}\text{W}_{174}\text{O}_{612}\}$  and assignment table

#### 4.4 Inferred charge assignments of the 3 POWs

Since it sufficient resolution to directly determine the charge state for each ion observed to form from the POW series (compounds **A-C**) was not always available, the following method was employed as a check:

- The first peak in a structures charge series was identified.
- For a series of possible charges, an *m/z* value was calculated based on the core anion (as observed in XRD) and  $\text{Na}^+$  cations.

- For each of these values, the discrepancy (“sum error”) between the observed  $m/z$  and calculated value was determined.
- The correct charge was assigned as that for which the smallest discrepancy was observed – in each case this was clear.  
(n.b. A small discrepancy is observed even in correct assignments, since this model presumes homogenous counterions and no associated solvent molecules; assignments were checked in more than one case where the isotopic pattern was resolved for at least one peak in a series)

#### 4.4.1 Compound A charge assignment

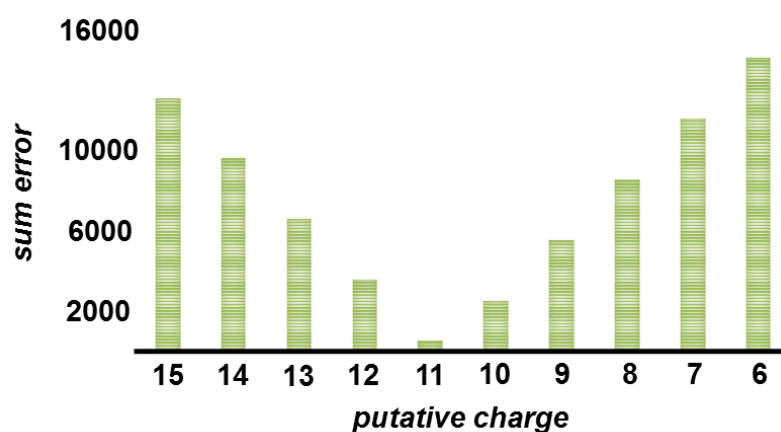

**Fig. S15.** Charge assignment for the first peak in the compound A series (=11)

#### 4.4.2 Compound B charge assignment

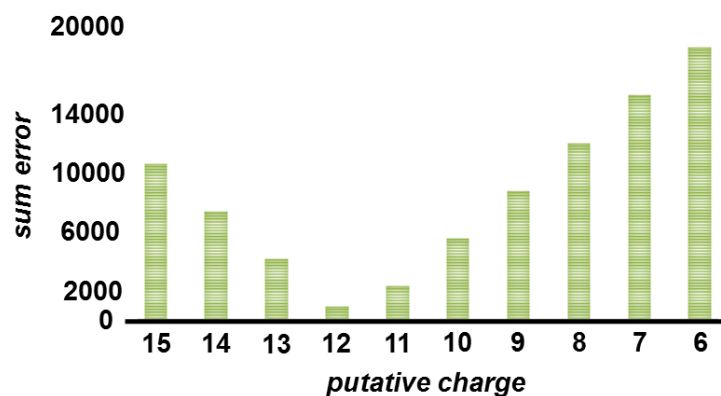

**Fig. S16.** Charge assignment for the first peak in the compound **B** series (=12)

#### 4.4.3 Compound **C** charge assignment

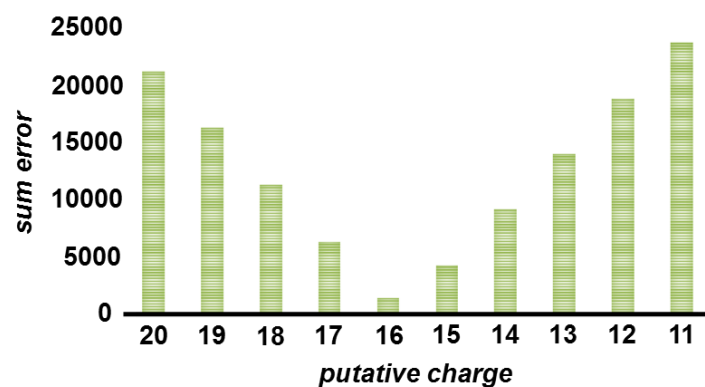

**Fig. S17.** Charge assignment for the first peak in the compound **C** series (=16)

## 5. Ion-Mobility Mass Spectrometry of two literature standards – oligothymidine and Cytochrome C

### 5.1 Mass spectrum of oligothymidine (T10)

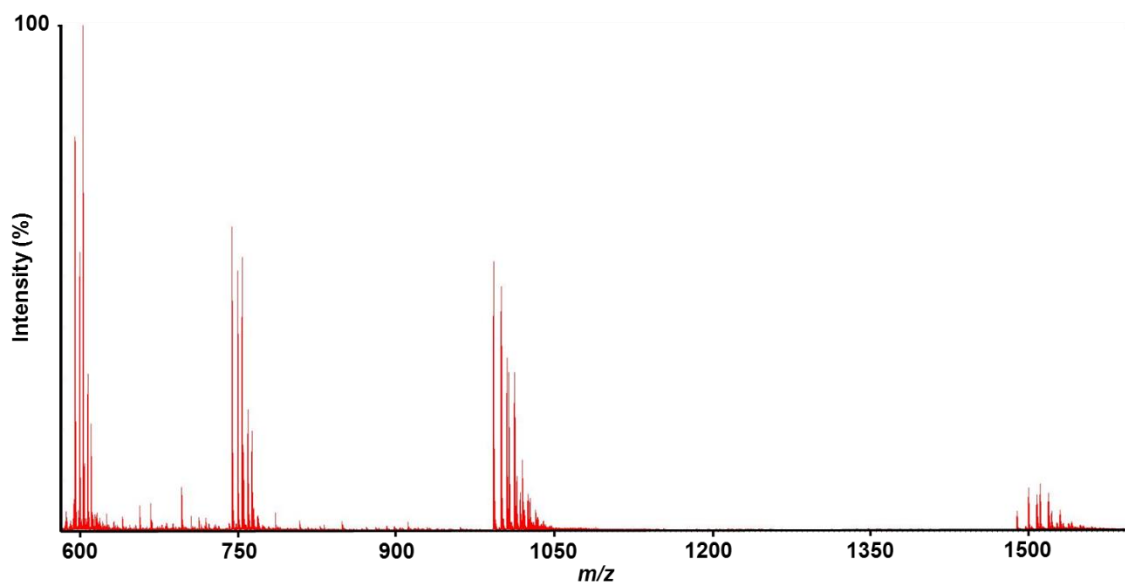

**Fig. S18.** HRES-ESI-MS of the literature standard T10

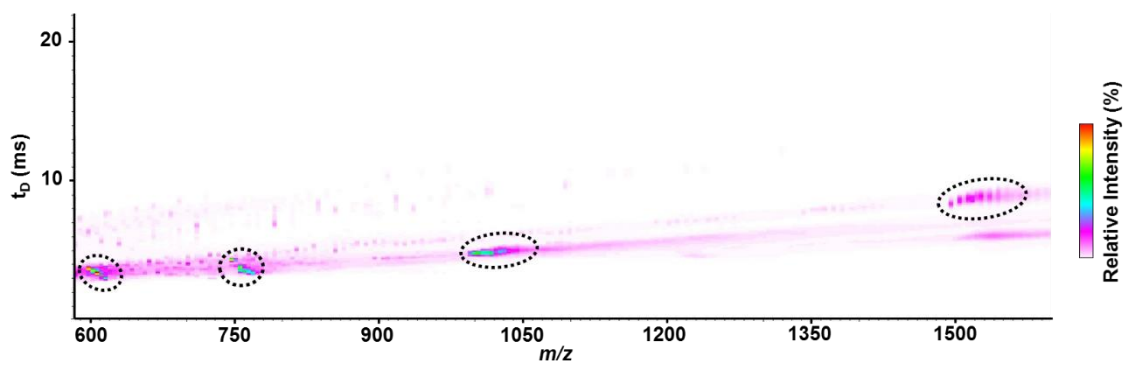

| $m/z$ | $z$ | $t_D$ (ms) | $^{TW}CCS_{N_2 \rightarrow He}$ | $^{DT}CCS_{He}$ (lit) |
|-------|-----|------------|---------------------------------|-----------------------|
| 594   | 5   | 3.638      | 553                             | 627                   |
| 743   | 4   | 4.19       | 493                             | 537                   |
| 992   | 3   | 4.631      | 399                             | 446                   |
| 1488  | 2   | 8.269      | 413                             | 447                   |

**Fig S19.** TW-IM-MS of the literature standard T10 and assignment table

## 5.2 Mass Spectrum of Cytochrome C

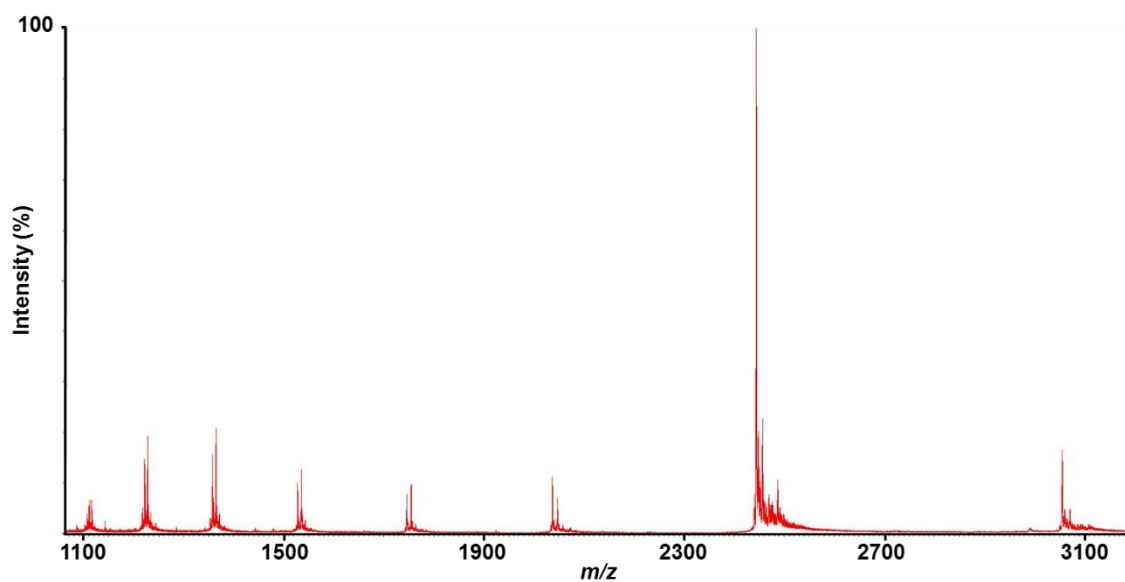

**Fig. S20.** HRES-ESI-MS of the literature standard cytochrome c

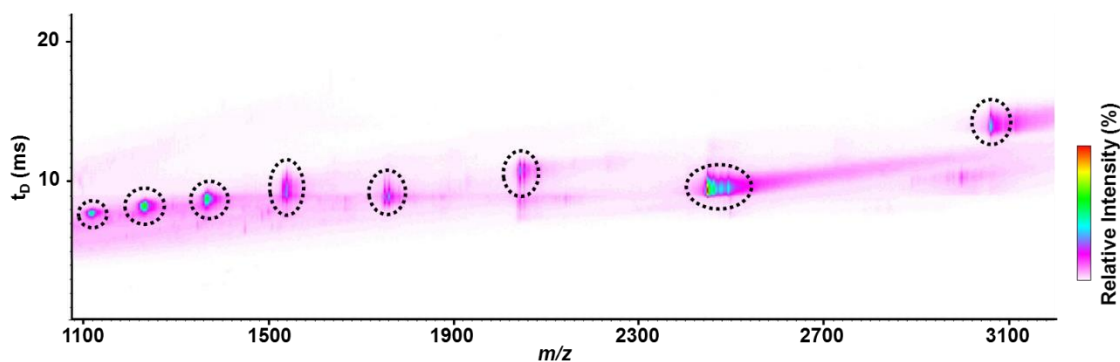

| <i>m/z</i> | <i>z</i> | <i>t<sub>D</sub></i> (ms) | <sup>TW</sup> CCS <sub>N<sub>2</sub>→He</sub> | <sup>DT</sup> CCS <sub>He</sub> (lit) |
|------------|----------|---------------------------|-----------------------------------------------|---------------------------------------|
| 1122       | 11       | 7.718                     | 2149                                          | 2305                                  |
| 1234       | 10       | 8.159                     | 2038                                          | 2207                                  |
| 1371       | 9        | 8.71                      | 1928                                          | 2024                                  |
| 1543       | 8        | 9.041                     | 1763                                          | 1760                                  |
| 1763       | 7        | 8.82                      | 1514                                          | 1586                                  |
| 2058       | 6        | 10.805                    | 1514                                          | 1535                                  |
| 2058       | 6        | 8.71                      | 1285                                          | 1351                                  |
| 2470       | 5        | 9.372                     | 1132                                          | 1246                                  |
| 3096       | 4        | 14.112                    | 1237                                          | 1174                                  |

**Fig. S21.** TW-IM-MS of the literature standard cytochrome c and assignment table

## 6. Synthesis and Ion-Mobility Mass Spectrometry of Unknown POWs

### 6.1 Synthesis of “Unknown” POWs

“Unknown” POWs (compounds **D** and **E**), were obtained from reactions analogous to those yielding Compound **B**.

#### Unknown Structure D

K<sub>2</sub>WO<sub>4</sub>·2H<sub>2</sub>O (1.0 g, 3.07 mmol), H<sub>3</sub>PO<sub>3</sub> (0.3 g, 3.6 mmol) and dimethylamine hydrochloride (0.5 g, 6.13 mmol) were dissolved in 40 mL water. The pH of the mixture was adjusted to 3.3 quickly by 37% hydrochloric acid. After the solution was stirred for around 20 min, Co(NO<sub>3</sub>)<sub>2</sub>·6H<sub>2</sub>O (0.08 g, 0.27 mmol) was then added into the solution, whose pH was dropped to 3.1. The pale pink solution was filtered and left for evaporation. Purple block crystals were obtained within two weeks.

#### Unknown Structure E

K<sub>2</sub>WO<sub>4</sub>·2H<sub>2</sub>O (1.0 g, 3.07 mmol), Na<sub>2</sub>TeO<sub>3</sub> (0.064 g, 0.29 mmol), KCl (0.08g, 1.0 mmol) and dimethylamine hydrochloride (0.5 g, 6.13 mmol) were dissolved in 40 mL water. The pH of the mixture was adjusted to 3.3 quickly by 37% hydrochloric acid. After the solution was stirred for around 20 min, it increased to 3.5. MnCl<sub>2</sub>·4H<sub>2</sub>O (0.08 g, 0.27 mmol) was then added into the solution, whose pH was dropped to 3.3. The pale yellow solution was filtered and left for evaporation. Pale yellow block crystals were obtained within 1 week.



## 6.2 Mass spectrum of compound **D** – unknown POW

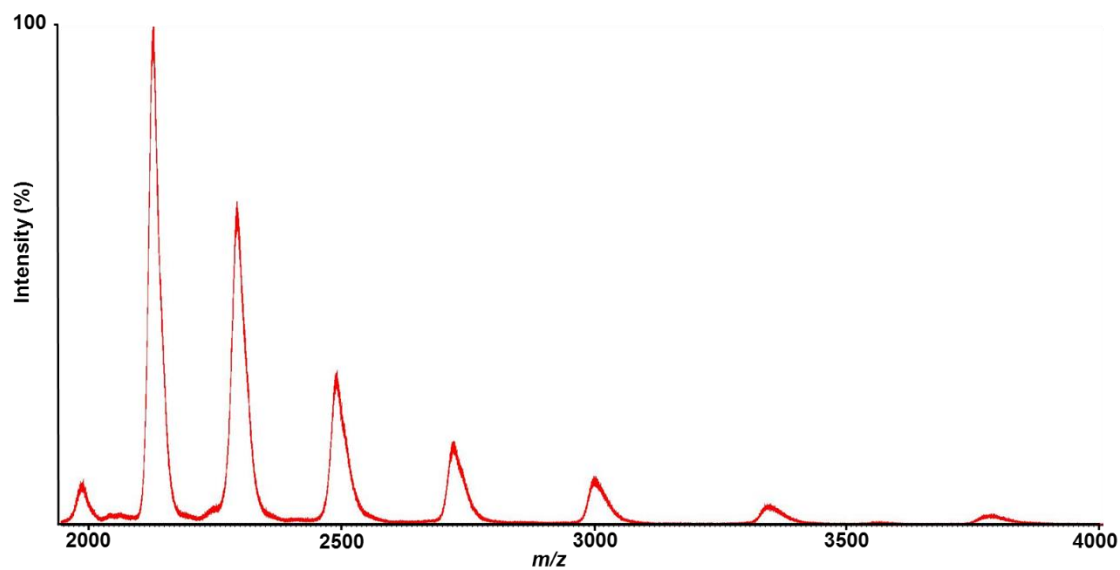

**Fig. S22.** HRES-ESI-MS of compound **D**

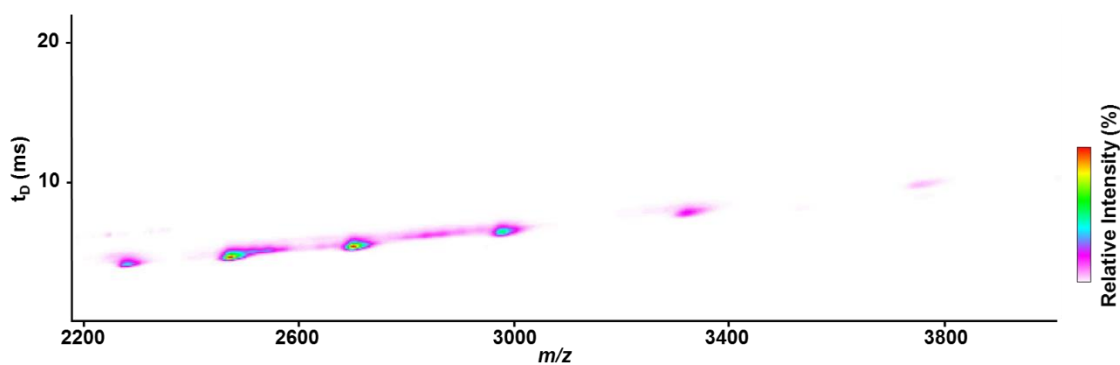

|            | $m/z$ | $z$ | $t_D$ (ms) | $^{TW}CCS_{N_2 \rightarrow He}$ |
|------------|-------|-----|------------|---------------------------------|
| Compound D | 2278  | 13  | 3.969      | 1026                            |
|            | 2472  | 12  | 4.52       | 1043                            |
|            | 2701  | 11  | 5.292      | 1075                            |
|            | 2975  | 10  | 6.395      | 1125                            |
|            | 3317  | 9   | 7.718      | 1164                            |
|            | 3756  | 8   | 9.813      | 1236                            |

**Fig. S23.** TW-IM-MS of compound **D** and data table

## 6.3 Mass spectrum of compound **E** – unknown POW

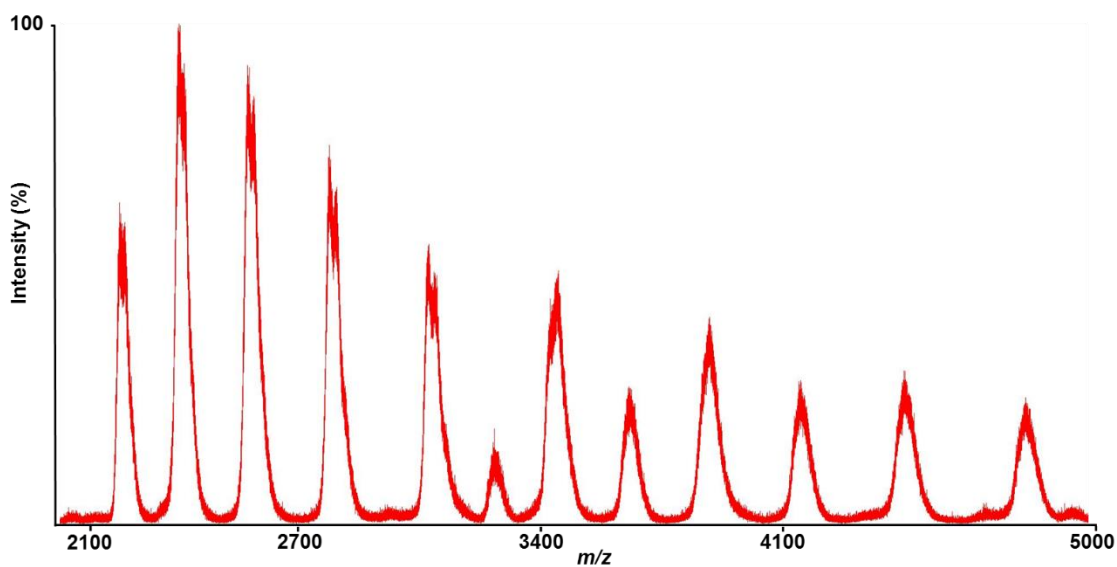

Fig. S24. HRES-ESI-MS of compound E

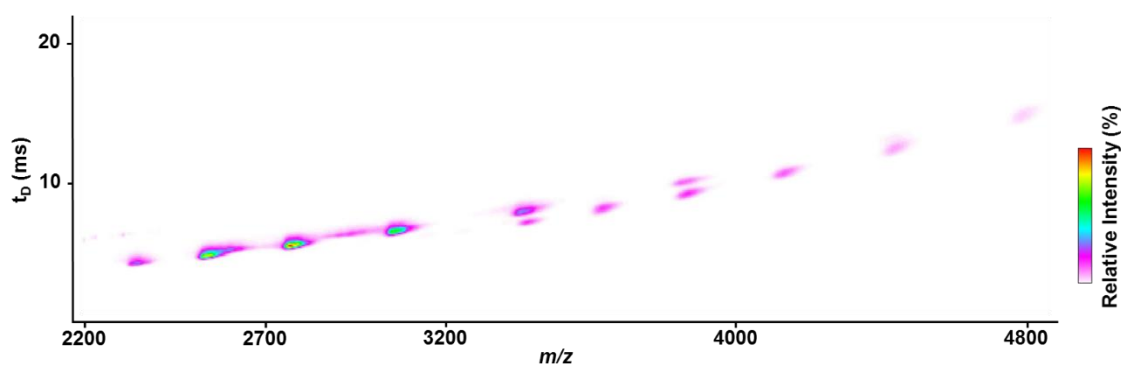

|                          | $m/z$ | $z$ | $t_D$ (ms) | $^{TW}CCS_{N_2 \rightarrow He}$ |
|--------------------------|-------|-----|------------|---------------------------------|
| Compound E<br>(monomers) | 2353  | 13  | 4.19       | 1068                            |
|                          | 2546  | 12  | 4.741      | 1081                            |
|                          | 2768  | 11  | 5.513      | 1108                            |
|                          | 3054  | 10  | 6.505      | 1139                            |
|                          | 3403  | 9   | 7.938      | 1188                            |
| (dimers)                 | 3844  | 8   | 10.033     | 1257                            |
|                          | 3422  | 18  | 7.166      | 2202                            |
|                          | 3630  | 17  | 8.159      | 2290                            |
|                          | 3866  | 16  | 9.261      | 2368                            |
|                          | 4126  | 15  | 10.695     | 2470                            |
|                          | 4435  | 14  | 12.569     | 2599                            |
|                          | 4789  | 13  | 14.884     | 2735                            |

Fig. S25. TW-IM-MS of compound E data table

#### 6.4 Inferred charge assignments of the Unknown POWs

Same procedure as described in section 2.4

#### 6.4.1 Compound **D** charge assignment

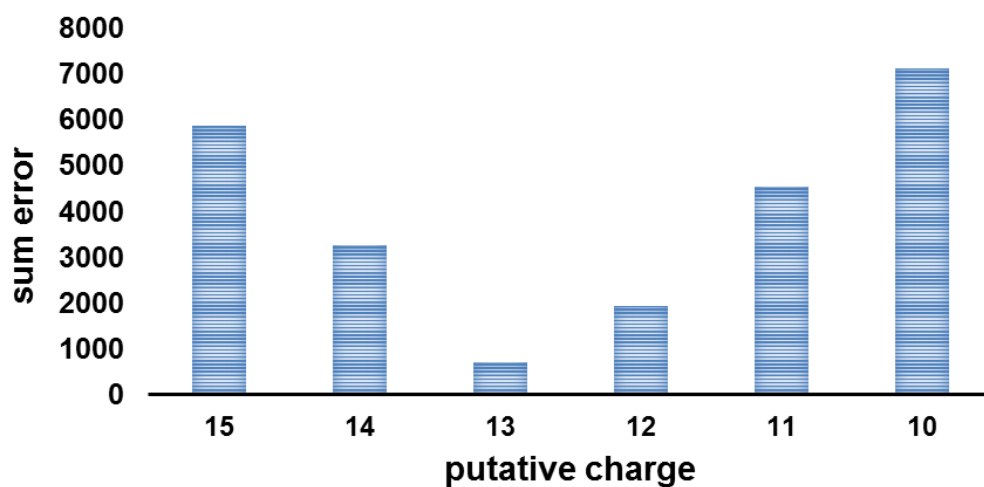

Fig. S26. Charge assignment for the first peak in the compound **D** series (=13)

#### 6.4.2 Compound **E<sub>1</sub>** charge assignment (**monomeric** series)

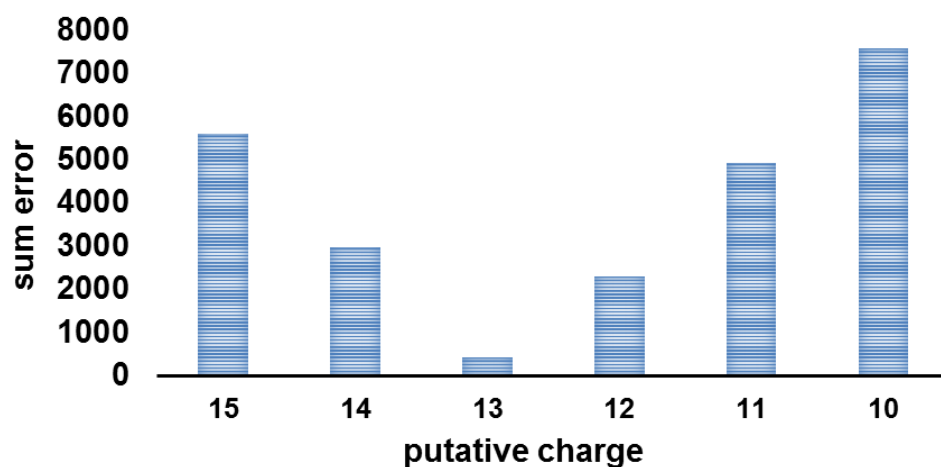

Fig. S27. Charge assignment for the first peak in the compound **E<sub>1</sub>** series (=13)

#### 6.4.3 Compound **E<sub>2</sub>** charge assignment (**dimeric** series)

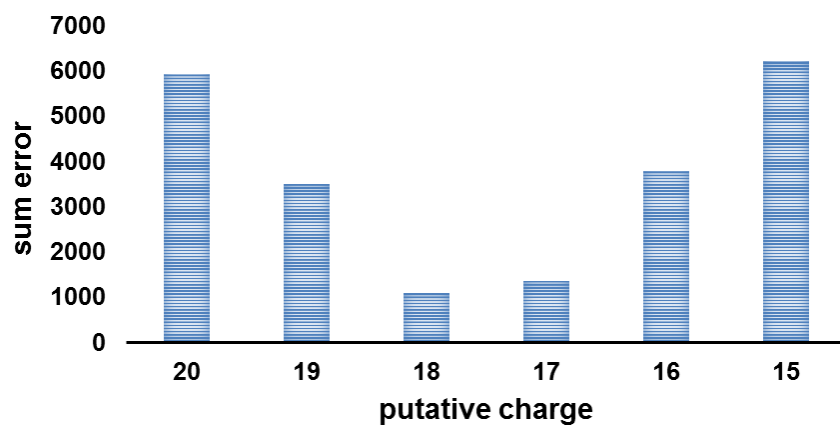

Fig. S28. Charge assignment for the first peak in the compound E<sub>2</sub> series (=18)

## 7. Calibration Curves

### 7.1 Calibration curve – calibrants (compounds 1-4) and POWs (compounds A-C)

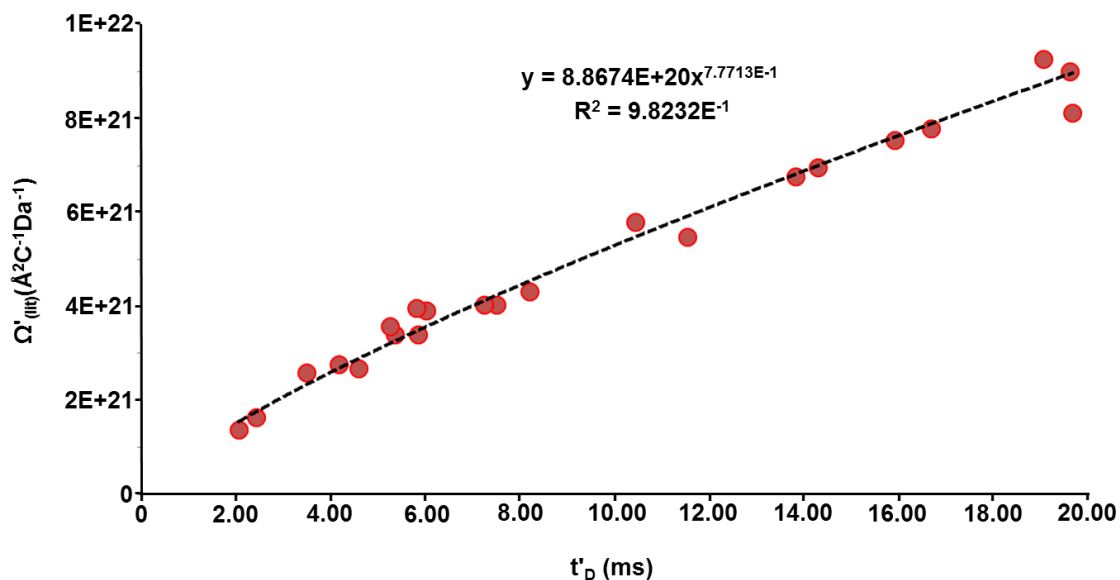

**Fig. S29.** TW-IM-MS calibration curve generated from compounds 1-4 run under the conditions used to assess compounds A-C; equation corresponds to the fitted power trend-line.

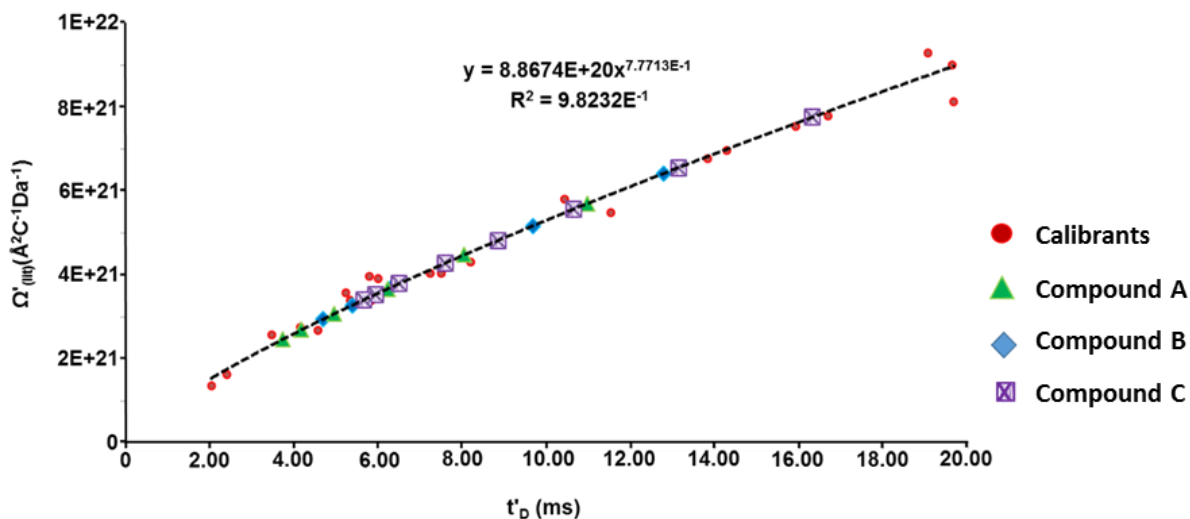

**Fig. S30.** Same calibration as above, but with the additional analyte species derived from compounds A-C included, CCS values for these points were calculated from the fitted trend-line. Note: all of the analyte species (derived from compounds A-C) can be assessed using this calibration curve without extrapolation beyond the range covered by the calibrant set (red dots).

## 7.2 Calibration curve – calibrants (compounds 1-4) and literature standards

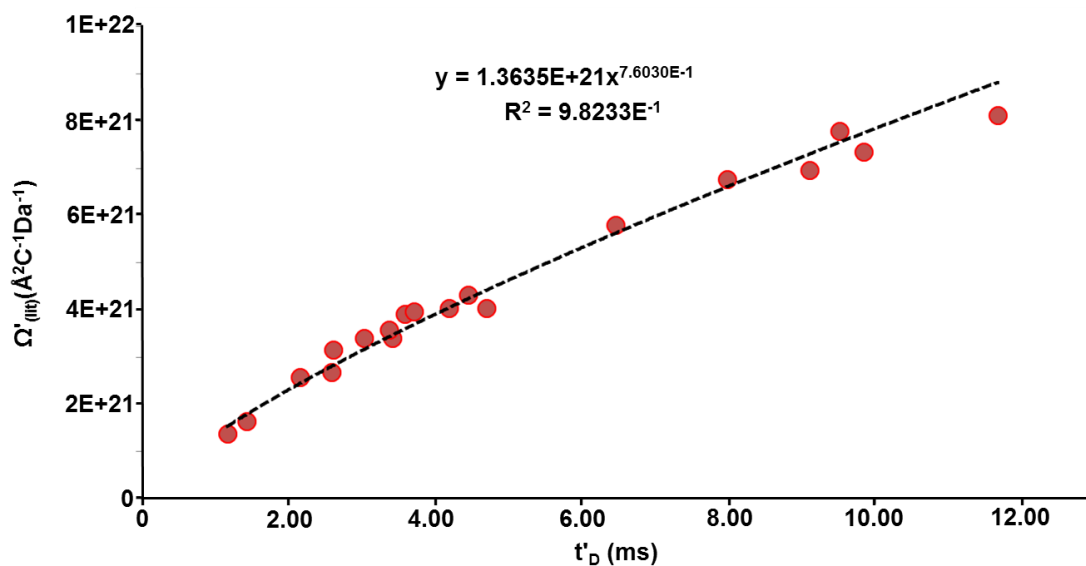

**Fig. S31.** TW-IM-MS calibration curve generated from compounds 1-4 run under the conditions used to assess  $T_{10}$  and **CytC**; equation corresponds to the fitted power trend-line.

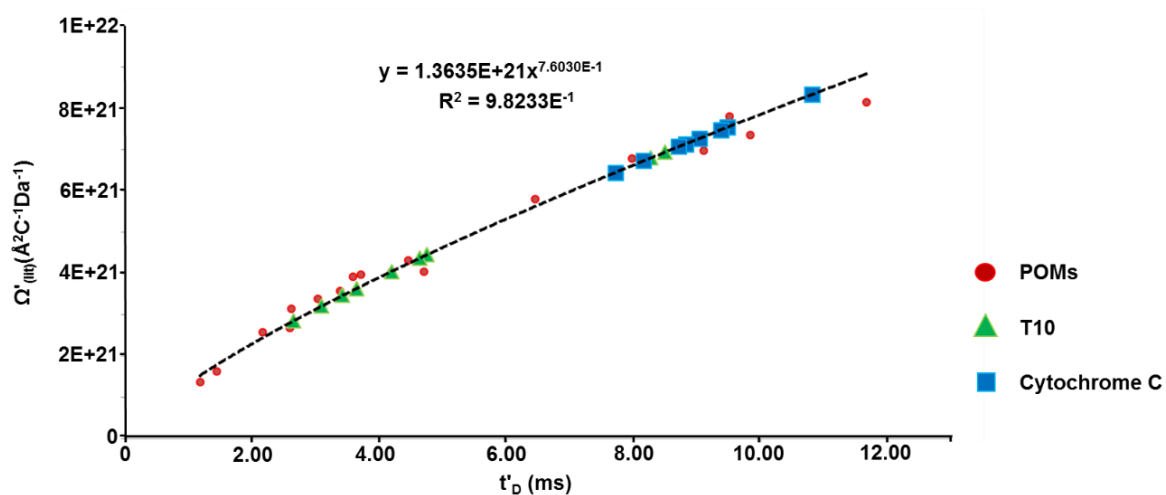

**Fig. S32.** Same calibration as above, but with the additional analyte species derived from  $T_{10}$  and **CytC** included, CCS values for these points were calculated from the fitted trend-line. Note: all of the analyte species (derived from  $T_{10}$  and **CytC**) can be assessed using this calibration curve without extrapolation beyond the range covered by the calibrant set (red dots).

7.3 Calibration curve – calibrants (compounds 1-4) and unknown POWs (compounds D and E)

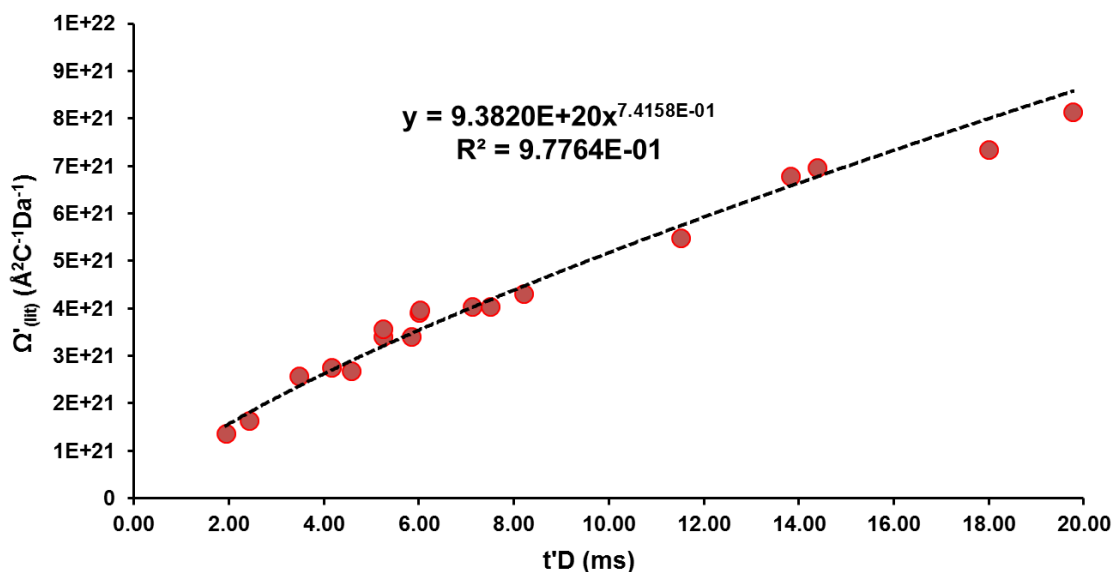

**Fig S33.** TW-IM-MS calibration curve generated from compounds 1-4 run under the conditions used to assess compounds D and E; equation corresponds to the fitted power trend-line.

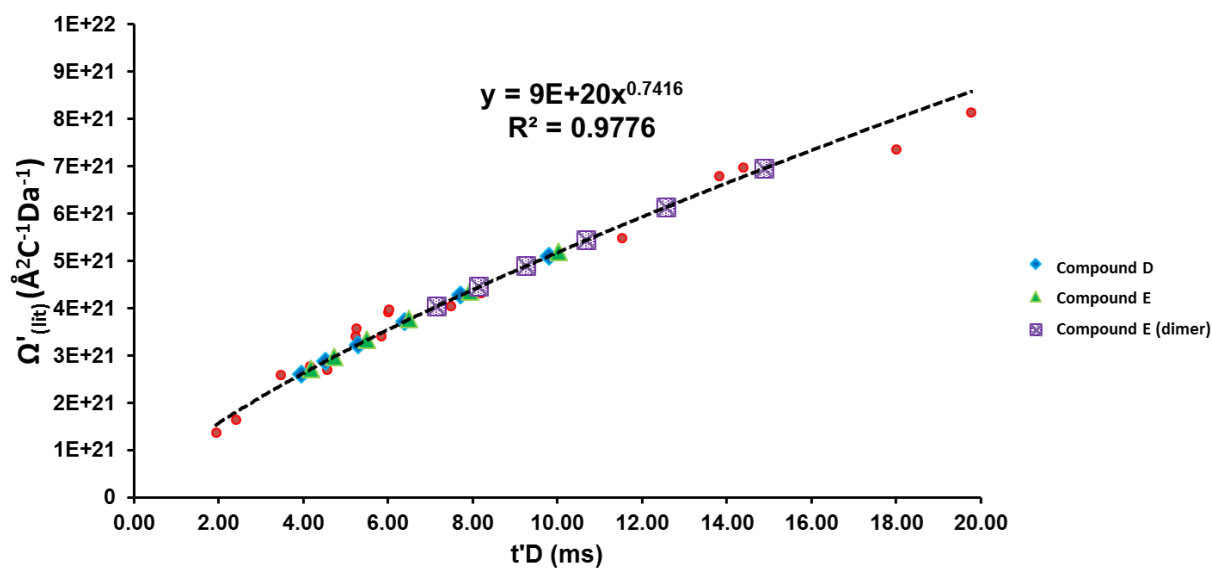

**Fig. S34.** Same calibration as above, but with the additional analyte species derived from compounds D and E included, CCS values for these points were calculated from the fitted trend-line. Note: all of the analyte species (derived from compounds D and E) can be assessed using this calibration curve without extrapolation beyond the range covered by the calibrant set (red dots).

## 8. Comparison of CCS values – known vs. unknown POWs

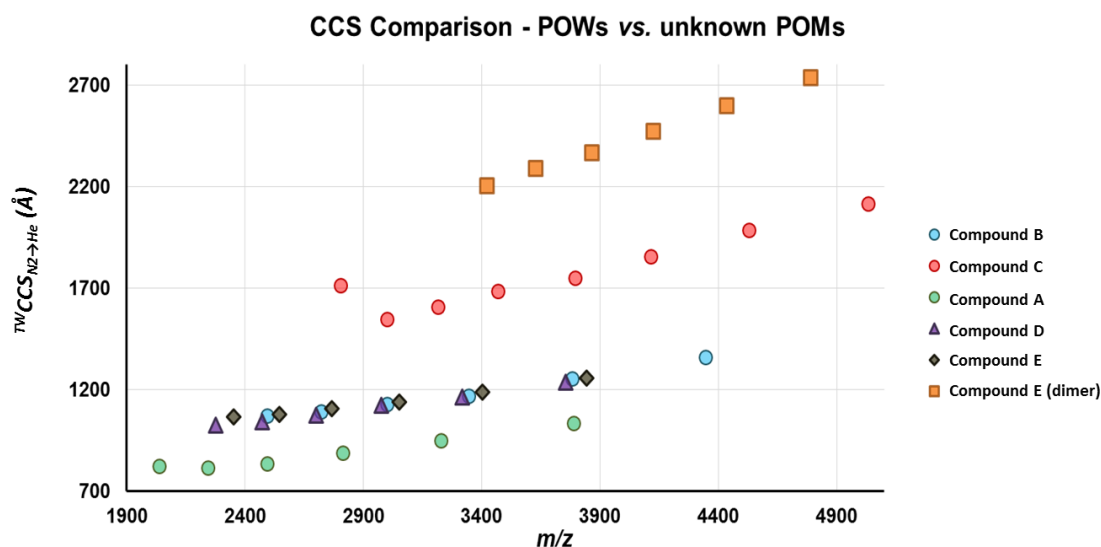

**Fig. S35.** Plot depicting the  $^{TW}CCS_{N_2 \rightarrow He}$  value for each POW  $m/z$  species – known and unknown – serves to highlight the tight correlation between both of the compounds **D** and **E**<sub>1</sub> (unknown monomeric series) with compound **B** (the known POW tetramer).

## 9. References

- (1) Hasenknopf, B.; Delmont, R.; Herson, P.; Gouzerh, P. *Eur. J. Inorg. Chem.* **2002**, 1081.
- (2) Song, Y.-F.; McMillan, N.; Long, D.-L.; Thiel, J.; Ding, Y. L.; Chen, H. S.; Gadegaard, N.; Cronin, L. *Chem. Eur. J.* **2008**, *14*, 2349.
- (3) McCullough, B. J.; Kalapothakis, J.; Eastwood, H.; Kemper, P.; MacMillan, D.; Taylor, K.; Dorin, J.; Barran, P. E. *Anal. Chem.* **2008**, *80*, 6336.
- (4) Kemper, P. R.; Bowers, M. T. *J. Am. Soc. Mass Spectrom.* **1990**, *1*, 197.
- (5) Wyttenbach, T.; Kemper, P. R.; Bowers, M. T. *Int. J. Mass Spectrom.* **2001**, *212*, 13.
- (6) Mason, E. A.; McDaniel, E. *Transport Properties of Ions in Gases*; **1988**.
- (7) Viehland, L. A.; Mason, E. A. *Ann. Phys. (N. Y.)* **1978**, *110*, 287.
- (8) Gao, J.; Yan, J.; Beeg, S.; Long, D. L.; Cronin, L. *J. Am. Chem. Soc.* **2013**, *135*, 1796.
